# Supplementary material
Source: Springer Nature journal article supplement (https://www.springermedizin.de/resource/supplementary/13058_2011_2910_MOESM11_ESM.pdf/9702774)

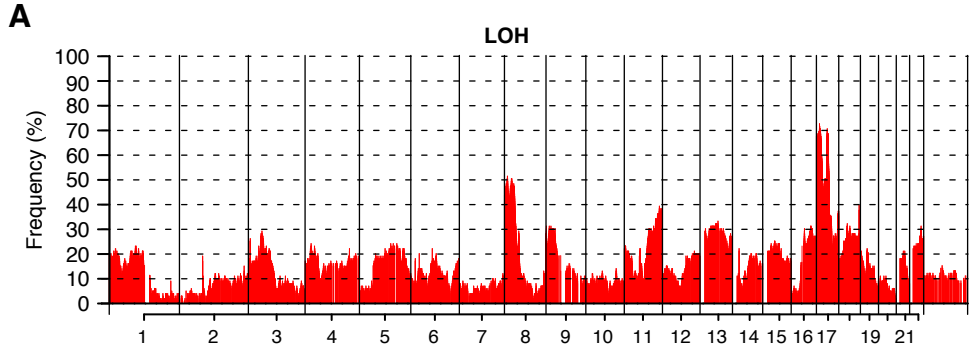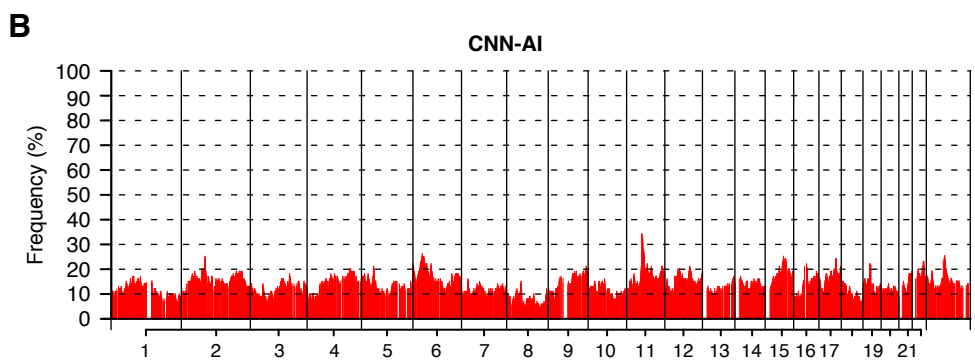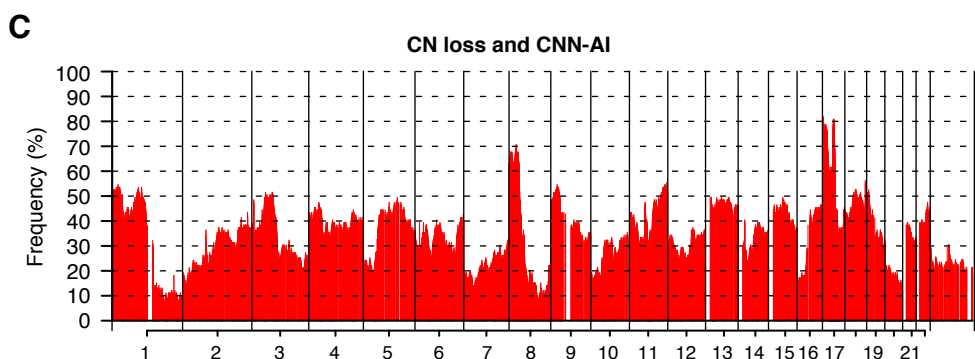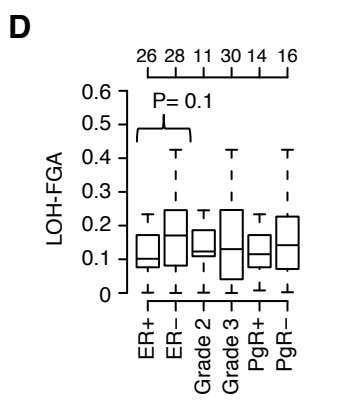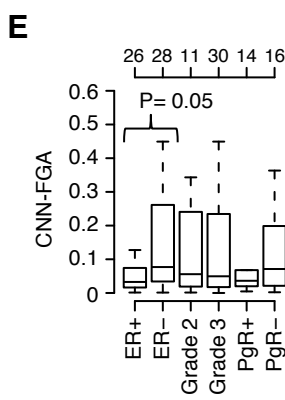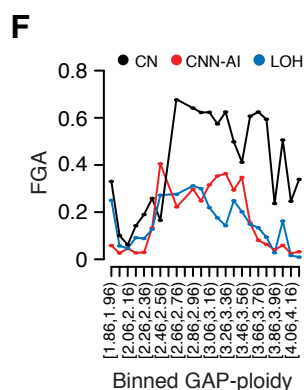

Supplement: MOESM11 [file 9702774]
